# Supplementary material for: Synthesis and reactivity of uranium(iv) amide complexes supported by a triamidotriazacyclononane ligand
Source: Royal Society of Chemistry journal article supplement (doi:10.1039/b603000a), 2006-01-01
Supplement: b603000a.pdf [file b603000a.pdf]

**[U{(SiMe<sub>2</sub>NPh)<sub>3</sub>-tacn}(OPPh<sub>3</sub>)]**

The compound was obtained as a dark red solid in quantitative yield by adding one equiv of OPPh<sub>3</sub> to a solution of [U{(SiMe<sub>2</sub>NPh)<sub>3</sub>-tacn}] in toluene.

<sup>1</sup>H-NMR (C<sub>6</sub>D<sub>6</sub>, 20 °C) 7.40 (6H, *d*, H-o, OPPh<sub>3</sub>); 6.97 (6H, *t*, H-m, OPPh<sub>3</sub>), 6.58 (6H, H-m); 6.41 (3H, H-p); 6.07 (6H, CH<sub>2</sub>); 5.44 (3H, *t*, H-p,OPPh<sub>3</sub>); 3.27 (6H, *b*, H-o); -1.82 (6H, CH<sub>2</sub>); -3.18 (18H, SiMe<sub>2</sub>)

Dark red crystals of [U{(SiMe<sub>2</sub>NPh)<sub>3</sub>-tacn}(OPPh<sub>3</sub>)]·2C<sub>7</sub>H<sub>8</sub> were obtained from a concentrated solution of [U{(SiMe<sub>2</sub>NPh)<sub>3</sub>-tacn}(OPPh<sub>3</sub>)] in toluene. The molecular structure is shown in Figure S1 and selected bond distances and angles are given in Table S1.

Data were collected at 110K on a Bruker APEX CCD area-detector diffractometer with graphite-monochromatized MoK<sub>α</sub> radiation (λ=0.71069 Å) in the φ and ω scan mode.

The structure was solved by direct methods using SIR97<sup>25</sup> and refined by full-matrix least squares refinements on F<sup>2</sup> using SHELXL-97<sup>24</sup> and the winGX software package.<sup>26</sup>

All non-hydrogen atoms were refined with anisotropic thermal motion parameters, and the hydrogen atoms were assigned idealized positions based on the geometries of their attached carbon atoms. The drawing was made with ORTEP 3.<sup>27</sup> A summary of the crystallographic data is given in Table S2.

CCDC reference 299439.

**Table S1.** Selected bond lengths [ $\text{\AA}$ ] and angles (deg.) for

$[\text{U}\{(\text{SiMe}_2\text{NPh})_3\text{-tacn}\}(\text{OPPh}_3)]\cdot 2\text{C}_7\text{H}_8$

---

|             |           |
|-------------|-----------|
| U-N(1)      | 2.454(3)  |
| U-N(2)      | 2.468(3)  |
| U-N(3)      | 2.436(2)  |
| U-N(4)      | 2.762(3)  |
| U-N(5)      | 2.785(3)  |
| U-N(6)      | 2.750(3)  |
| U-O         | 2.483(2)  |
| <hr/>       |           |
| N(1)-U-N(2) | 120.56(9) |
| N(1)-U-N(3) | 117.35(9) |
| N(2)-U-N(3) | 118.43(9) |
| O-U-N(1)    | 84.36(8)  |
| O-U-N(2)    | 83.79(8)  |
| O-U-N(3)    | 82.69(8)  |

---

**Table S2.** Crystallographic Data

|                                       | [U{(SiMe <sub>2</sub> NPh) <sub>3</sub> -tacn}(OPPh <sub>3</sub> )]·2C <sub>7</sub> H <sub>8</sub> |
|---------------------------------------|----------------------------------------------------------------------------------------------------|
| Formula                               | C <sub>62</sub> H <sub>76</sub> N <sub>6</sub> Si <sub>3</sub> OPU                                 |
| fw                                    | 1274.56                                                                                            |
| crystal syst                          | orthorhombic                                                                                       |
| space group                           | P212121                                                                                            |
| <i>a</i> , Å                          | 12.2797(4)                                                                                         |
| <i>b</i> , Å                          | 17.8483(6)                                                                                         |
| <i>c</i> , Å                          | 27.1851(8)                                                                                         |
| <i>V</i> , Å <sup>3</sup>             | 5958.2(3)                                                                                          |
| <i>Z</i>                              | 4                                                                                                  |
| ρ <sub>calc</sub> , gcm <sup>-3</sup> | 1.421                                                                                              |
| Crystal size, mm <sup>3</sup>         | 0.28x0.18x0.14                                                                                     |
| μ(MoKα), mm <sup>-1</sup>             | 2.857                                                                                              |
| Theta range, °                        | 1.82 to 34.41                                                                                      |
| Measured reflections                  | 70126                                                                                              |
| Independent reflections [R(int)]      | 24465 (0.0590)                                                                                     |
| Observed reflections                  | 18480                                                                                              |
| [I>2σ(I)]                             |                                                                                                    |
| R <sub>1</sub>                        | 0.0481                                                                                             |
| wR <sub>2</sub>                       | 0.0628                                                                                             |

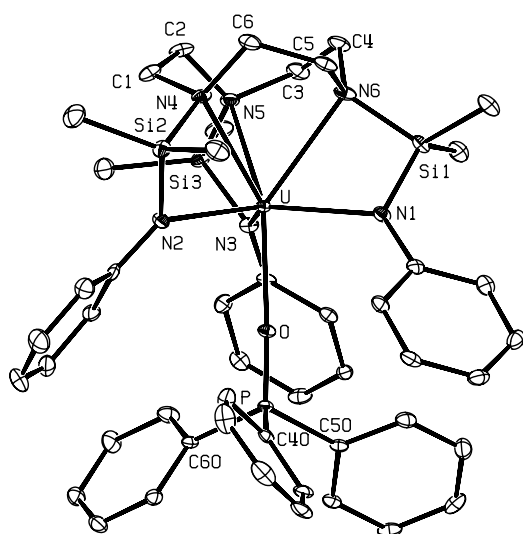

**Fig S1** - ORTEP diagram of [U{(SiMe<sub>2</sub>NPh)<sub>3</sub>-tacn}(OPPh<sub>3</sub>)] using 40 % probability ellipsoids
